# Supplementary material for: ATM Release at Resected Double-Strand Breaks Provides Heterochromatin Reconstitution to Facilitate Homologous Recombination
Source: PLOS journal article supplement (doi:10.1371/journal.pgen.1003667), 2013-08-01

A

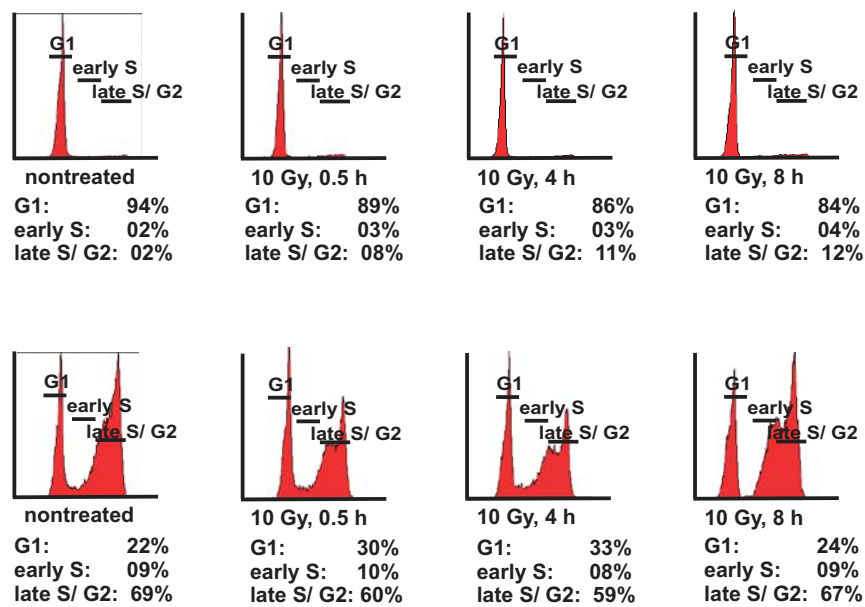

B

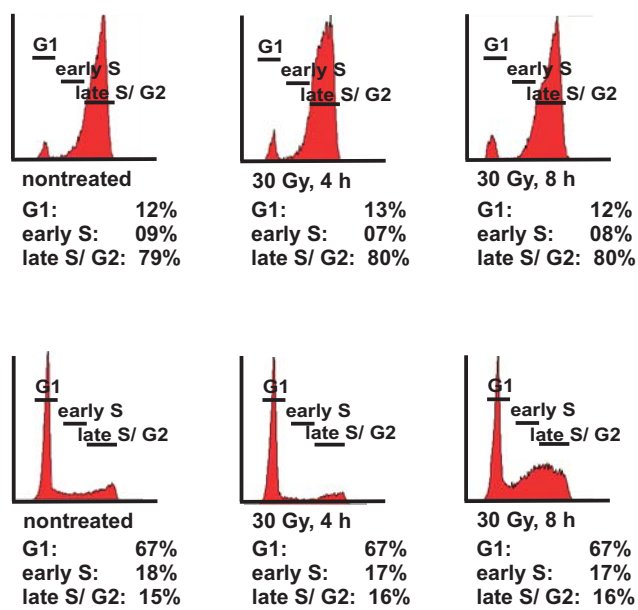

C

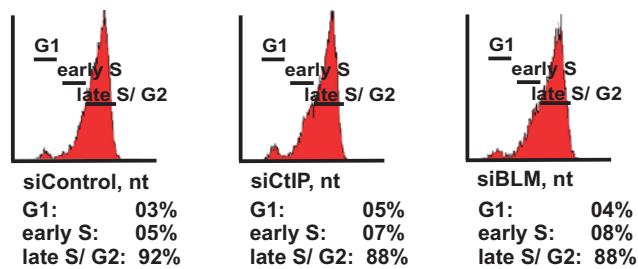

Supplement: S2 (10.1371/journal.pgen.1003667.s002) [file journal.pgen.1003667.s002]
